# Supplementary material for: Head-to-head comparison of the safety of tocilizumab and tumor necrosis factor inhibitors in rheumatoid arthritis patients (RA) in clinical practice: results from the registry of Japanese RA patients on biologics for long-term safety (REAL) registry
Source: PubMed Central journal article supplement (PMC4384380; doi:10.1186/s13075-015-0583-8), 2015-03-23
Supplement: 13075_2015_583_MOESM1_ESM.pdf [file 13075_2015_583_MOESM1_ESM.pdf]

Supplementary Table 1. Demographic and clinical characteristics of RA patients treated with methotrexate at baseline

|                                                   | <b>TCZ group</b> | <b>TNFI group</b>   | <b>p value</b> |
|---------------------------------------------------|------------------|---------------------|----------------|
|                                                   | <b>(n=160)</b>   | <b>(n=260)</b>      |                |
| Age, years                                        | 58.03 ± 12.35    | 56.50 ± 15.10       | 0.564          |
| Female, %                                         | 85.6             | 82.3                | 0.373          |
| Disease duration, years                           | 9.22 ± 7.68      | 8.05 ± 8.84         | 0.003          |
| Steinbrocker's Stage*<br>(III or IV), %           | 49.4             | 35.4                | 0.005          |
| Steinbrocker's Class*<br>(3 or 4), %              | 26.9             | 18.5                | 0.042          |
| Previous biologic use, %                          | 77.5             | 10.8                | <0.001         |
| Number of previous non-biological<br>DMARDs ≥3, % | 42.5             | 36.5                | 0.223          |
| DAS28CRP (3)**<br>(n=118)                         | 4.39 ± 1.19      | 4.25 ± 1.24 (n=238) | 0.235          |
| Pulmonary diseases †, %                           | 18.1             | 12.7                | 0.127          |
| Diabetes mellitus, %                              | 10.0             | 9.2                 | 0.794          |
| Liver diseases ‡, %                               | 4.4              | 3.8                 | 0.789          |
| Kidney diseases §, %                              | 1.9              | 0.8                 | 0.284          |

|                               |             |             |        |
|-------------------------------|-------------|-------------|--------|
| MTX dose, mg/week             | 8.41 ± 2.80 | 8.54 ± 2.28 | 0.237  |
| Oral corticosteroids use, %   | 68.8        | 50.0        | <0.001 |
| PSL-equivalent dose ¶, mg/day | 5.25 ± 2.92 | 4.91 ± 3.20 | 0.261  |

RA: rheumatoid arthritis; TCZ: tocilizumab; TNF: tumor necrosis factor; DMARDs: disease-modifying antirheumatic drugs; DAS28: disease activity score including 28-joint count; CRP: C-reactive protein; MTX: methotrexate; PSL: prednisolone

\*Steinbrocker's classification was used to define RA disease stages and classes.

\*\*DAS 28CRP (3) was calculated based on three variables; swollen and tender 28-joint counts and CRP.

†Pulmonary diseases included interstitial lung disease, chronic obstructive pulmonary disease, and asthma.

‡Liver diseases included hepatitis B carrier, hepatitis C carrier, fatty liver, hepatitis, primary biliary cirrhosis, positive anti-hepatitis C antibody, cholelithiasis, and abnormal liver function tests.

§Kidney diseases included nephrotic syndrome, nephritis, renal failure, chronic kidney disease, renal hypertension, hemi-kidney, and elevation of serum creatinine.

¶The oral corticosteroids dose was converted to the equivalent prednisolone dosage.
